# Supplementary material for: Absence of heterosis in hybrid crested newts
Source: PeerJ. 2018 Jul 24;6:e5317. doi: 10.7717/peerj.5317 (PMC6063215; doi:10.7717/peerj.5317)
Supplement: Supplemental Information 1 [file peerj-06-5317-s001.xlsx]

## Sheet: Sheet1
Suppl. Inf. 1
Input consensus sequences for Kraken
SNP ID	Sequence
ace_var1	CTTTCTCTCAATCAGGTCCTACCTTTTTGACTATGCAAGAGCCAAASTACATGTTGATTATTWATTGCTAACAATKCTGATTCCATNNNNNNNNNNNNNNNNNNNNNGCAGGCCACATACCAWCAAACGGTTCTAGTCAAT[C/T]ACTCTGTGRTATATGACTAG
amot_var1	GAAAGAGCTGAGAATCTTACCAGACACCTTGCTCTCATTAAATCCT[C/A]AACAGACTGAAAATTAATATGATATARAGAAAGCCATAACCATGCTATTGGTTCTGGGTACCTTTCGAGGCCCGTCAAAAGCCTGAGCTTCTTC
arh_var1	GGGAAAAGTGACCGCGTCAAATAAAACTCTACAAATATGATGCTACACTACACAAAGTGAGCTTCTCTGTGTTCCAGTTCCTGTATCCGTTTTGGCCTGAGTCTTAGAG[G/C]TGGCTTCACTTCTGCTTGGTGAACGTCA
clasp2_var1	CCCTATTGCTGCTGTTTTATTTGCTTTGTTTTTATYTACTAAGCCTCCTGCCCC[C/-]TACCTGGAATKAATYGTGATGTGAAACCAGGCAGAACTAGTCTGTGCTGCCTGTGGACCAGTCACTGTGTTGTAGGTACATCATCTTAT
col18_var1	CTTCATATTGTCCAACAAAAGAAAGAAAATTGATGGCGTTCTGGCTCCTGCTTCGGGGCTATC[G/C]GAGGGTCCCCGYYGGCGATTCAGTTTTATGGGAGCKCAAAAAGAGCTACTCGCAGATTGGGACTGTACCCCTTCGA
col18_var2	CTTCATATTGTCCAACAAAAGAAAGAAAATTGATGGCGTTCTGGCTCCTGCTTCGGGGCTATCSGAGGGTCCCCG[T/C]YGGCGATTCAGTTTTATGGGAGCKCAAAAAGAGCTACTCGCAGATTGGGACTGTACCCCTTCGA
col18_var3	CTTCATATTGTCCAACAAAAGAAAGAAAATTGATGGCGTTCTGGCTCCTGCTTCGGGGCTATCSGAGGGTCCCCGYYGGCGATTCAGTTTTATGGGAGC[T/G]CAAAAAGAGCTACTCGCAGATTGGGACTGTACCCCTTCGA
ddx17_var1	ATGTTATCAATTACCTGCTATANNNCAGTAATCAGACCCTTCCCAACTCYATTAAGTTAAACGCCGCAACAATGCCTTTTTAATGTGCTGTAGAACTTTAGT[T/C]TTCCTAGATGTAGCCATGTAGACTACAACTGGCTCG
dnaj_var1	GAGTGTTGGAGCAGTATCCY[A/G]TAATATATAAAGGAATGCTGTGAGCAGACTTACTGTTTCTCCCAAGTAATTCCTTCAGAAGGGAGATACTTGATCTGGCAGTCCTKAACACCTTGCATGCATTTACCCTCCCTGT
dnaj_var2	GAGTGTTGGAGCAGTATCCYRTAATATATAAAGGAATGCTGTGAGCAGACTTACTGTTTCTCCCAAGTAATTCCTTCAGAAGGGAGATACTTGATCTGGCAGTCCT[T/G]AACACCTTGCATGCATTTACCCTCCCTGT
eif4ebp2_var1	TTCCATTTTATGAATTGGCAAATTAAGCATTCCRGTCRTCAACTTCTCATGCAGATACTTCCAAAGCGAAAGTATAAAAGCATAACAATTCATATGTTTGCAGATTTCCAGGTTT[A/T]AATTAANNNNGTCTAGTCCAC
fam178_var1	TTTACATTCTGTTACTCTCTTTAAACGTTTGGAGAACCATAGCATATGCACAAGTTAATTTGCATACTGTTCAGGCAAAATGAGATTTGAAATTTACA[C/A]GGTGTATATGTGGTGTTGTTTCTTTACAGAAAAGTCCCTAA
gak_var1	TTGCTTTAACCTGCATACTCYAGGATGTATGGAGGRTCGCATCAGAGAAACCAGTCCGCCGTTCCATTCACCA[G/C]GAGCTGTCATCATGTCAARCAAACACTAATATGCWATGCAGTCTGTACATTCCCGAAATTGTT
ganab_var1	GTTCATATGTGGGTTATCAACATACTTTAGAACACATCTCTCAACCTTGAGGTGAGAATTAGGGCAWTATTCATATTGTAACTGAAATCATTGTTG[A/C]AGAATTTCCTATCTCTGTATTCAYTGTAWATAACTTAAGTTGCC
hmp19_var1	AGTGTCATAGATGACATCTCCTTCTGGGAATCTCTGTTCTCTCTATTAGATGGTTATTYCACAAACAACATTTATTC[A/G]TGAMTGCTCTTATTAGGGAATTTTCTAAGGAGGTAGACAGCCAACAAGGGAACTAAGGTT
hmp19_var2	AGTGTCATAGATGACATCTCCTTCTGGGAATCTCTGTTCTCTCTATTAGATGGTTATTYCACAAACAACATTTATTCRTGA[A/C]TGCTCTTATTAGGGAATTTTCTAAGGAGGTAGACAGCCAACAAGGGAACTAAGGTT
msantd4_var1	GTACATTATCCTACCASTAGGAATT[G/T]SCGGTTTGTTTTTCACATCTTGATATCCCCACATYTAGTGCGCACCAAAGTAGCATGTCTCAAAATGTAAATCAGGAACTTGGAAACYGTGCACACACGGAGTCTAGAGTTAC
opa_var1	TACGCGGTGATGTCAAAGAGGG[C/T]RTTGGTGGTTGCCATTACTCACTGGTTCAGCCAGATTCCAGAGAGCTACTGAGGCTGGGAACTGTAAACTTCTTTCAATGTTGACTCACACTAAACAAACTGGGCGMTCCAACAGCGAT
plekhg1_var1	CTTACTTGTAAACAGAAACCCACCCCTCAATGCTGAGATTGCAAAGCAGAACTATTTTTCTAACTTTAAAGACAAAGGAGGGTCAGACGACAATGACGA[C/T]GATGATNNNTATGTTGAAATTAGGTCAGATGACGAGGACA
slc25_var1	TGCCAAAAATGGAGCAATCTTCAGGGGCTTGCTGCACACCAGGTTTATAAGAGACAATCTTCCACATGAKGGTNNNNGGAACATWCAGTNGTCACT[G/A]TCTCACACTCRGCTCCATGGTAGACTTGYTGAAAGATTGC
sre_var1	TAGTAATAGACTCACAATTGTGCAGCTGTGGATCAGCCATTTATCATTGGCTTGCACCA[A/T]CAGCAGCTTCAGGACAGACTRAGAACTTGCCATTAAAAACAGACGATAATTGCCCGCCACATTTTTACCCTTAATAG
ssh2_var1	CAGAAGCCACTCGCTGGTTGGCTTTTGTATTTAATGGCAAGGCCGCTCAGGATAGGTAACCATCACTGCGCACATCCACACCCAGACACACAACARAG[T/A]ACACCGGGATTCAGCTANNNTTTCCAGTTTACAGCAAGCG
supt6h_var1	GGATGCCCTTGCAGTGGTTCTGGGAGCAGTCTCCGAATAATGAGTGAGCCTACAGGAGTCTTT[A/C]CCTCTCTTCAAAAGCTCTGCTTTGCTAGTAATACAAAGAGCAAGACCAGCAGAGCAGTTATAGCTACTTTTGGTTGAAA
syncrip_var1	TTGTTCTAAAACT[T/A]TAGTGTTTTGCATTGAAAATTTAGTTGCTGTGATTTAAAGCAATACCTTTATTGGGACCCTTAAGGTYCAGTCCTGCTCGTGAAGGTTAATCATGATTGTCTATATCTTTATAGTAATTACTTG
usp_var1	GAGTGAAAAGTACCATTTACAATAGTGGAAATGTTGGCAAATTTAACCATAGTACATTTTGTAGATGGCATAAGATGGCTGCGTGCCCGCTCTAGTGTGG[A/G]AATTTCAACACGGTCATTGCAGCTGCTAAGTCTTATG
wiz_var1	ACACTTCATTCCAAACACTCTAATTACTCCAGTATCTTCTCACCAGTTYGTGATTTCTA[T/C]GTTTAATTCCAAAGGAGCAGCTGTTGAAACCTCAAAAGTGACAACATACACCTGTAAATATGAGCAGTCTGCCTCTGAC
ND4_var1	ATYCTAGCRGCAGTA[T/C]TRCTYAAGCTTGGRGGATAYGGMATTATTCGRATTACTATRATTCTTACCCCAYTDAYAAAAGAAATAGCRTRYCCSTTTATRATTCTMGCYTTATGRGRRGYYGTRATRACKAGCCTAATYTGYATACGACAAACARACCTTAARTCRMTAATYGCATAYTCRTCYRTWRGCCAYATRGGCCTAGTCATYGCCGCTATYATRATCCAAACACCRTKAAGCCTRMCAGGRGCTRTTAYYTTAATARTCTCACACGGRCTTATYTCATCARCCCTATTTTGCCTRGCRAACCTAAATTAYGAACGAACRCACAGTCGARCTYTRYTRTTAGTYCGKGGRGCCCAGRSRGTMCTRCCRCTRAYGRYAACCTGRTGRCTCRT…
ND4_var2	ATYCTAGCRGCAGTAYTRCTYAAGCTTGGRGGATAYGGMATTATTCGRATTACTATRATTCTTACCCCA[T/C]TDAYAAAAGAAATAGCRTRYCCSTTTATRATTCTMGCYTTATGRGRRGYYGTRATRACKAGCCTAATYTGYATACGACAAACARACCTTAARTCRMTAATYGCATAYTCRTCYRTWRGCCAYATRGGCCTAGTCATYGCCGCTATYATRATCCAAACACCRTKAAGCCTRMCAGGRGCTRTTAYYTTAATARTCTCACACGGRCTTATYTCATCARCCCTATTTTGCCTRGCRAACCTAAATTAYGAACGAACRCACAGTCGARCTYTRYTRTTAGTYCGKGGRGCCCAGRSRGTMCTRCCRCTRAYGRYAACCTGRTGRCTCRT…
ND4_var3	ATYCTAGCRGCAGTAYTRCTYAAGCTTGGRGGATAYGGMATTATTCGRATTACTATRATTCTTACCCCAYTDAYAAAAGAAATAGC[C/G]TRYCCSTTTATRATTCTMGCYTTATGRGRRGYYGTRATRACKAGCCTAATYTGYATACGACAAACARACCTTAARTCRMTAATYGCATAYTCRTCYRTWRGCCAYATRGGCCTAGTCATYGCCGCTATYATRATCCAAACACCRTKAAGCCTRMCAGGRGCTRTTAYYTTAATARTCTCACACGGRCTTATYTCATCARCCCTATTTTGCCTRGCRAACCTAAATTAYGAACGAACRCACAGTCGARCTYTRYTRTTAGTYCGKGGRGCCCAGRSRGTMCTRCCRCTRAYGRYAACCTGRTGRCTCRT…
ND4_var4	ATYCTAGCRGCAGTAYTRCTYAAGCTTGGRGGATAYGGMATTATTCGRATTACTATRATTCTTACCCCAYTDAYAAAAGAAATAGCRTRYCC[C/G]TTTATRATTCTMGCYTTATGRGRRGYYGTRATRACKAGCCTAATYTGYATACGACAAACARACCTTAARTCRMTAATYGCATAYTCRTCYRTWRGCCAYATRGGCCTAGTCATYGCCGCTATYATRATCCAAACACCRTKAAGCCTRMCAGGRGCTRTTAYYTTAATARTCTCACACGGRCTTATYTCATCARCCCTATTTTGCCTRGCRAACCTAAATTAYGAACGAACRCACAGTCGARCTYTRYTRTTAGTYCGKGGRGCCCAGRSRGTMCTRCCRCTRAYGRYAACCTGRTGRCTCRT…
ND4_var5	ATYCTAGCRGCAGTAYTRCTYAAGCTTGGRGGATAYGGMATTATTCGRATTACTATRATTCTTACCCCAYTDAYAAAAGAAATAGCRTRYCCSTTTATRATTCTMGCYTTATG[A/G]GRRGYYGTRATRACKAGCCTAATYTGYATACGACAAACARACCTTAARTCRMTAATYGCATAYTCRTCYRTWRGCCAYATRGGCCTAGTCATYGCCGCTATYATRATCCAAACACCRTKAAGCCTRMCAGGRGCTRTTAYYTTAATARTCTCACACGGRCTTATYTCATCARCCCTATTTTGCCTRGCRAACCTAAATTAYGAACGAACRCACAGTCGARCTYTRYTRTTAGTYCGKGGRGCCCAGRSRGTMCTRCCRCTRAYGRYAACCTGRTGRCTCRT…
ND4_var6	ATYCTAGCRGCAGTAYTRCTYAAGCTTGGRGGATAYGGMATTATTCGRATTACTATRATTCTTACCCCAYTDAYAAAAGAAATAGCRTRYCCSTTTATRATTCTMGCYTTATGRGRRGY[C/T]GTRATRACKAGCCTAATYTGYATACGACAAACARACCTTAARTCRMTAATYGCATAYTCRTCYRTWRGCCAYATRGGCCTAGTCATYGCCGCTATYATRATCCAAACACCRTKAAGCCTRMCAGGRGCTRTTAYYTTAATARTCTCACACGGRCTTATYTCATCARCCCTATTTTGCCTRGCRAACCTAAATTAYGAACGAACRCACAGTCGARCTYTRYTRTTAGTYCGKGGRGCCCAGRSRGTMCTRCCRCTRAYGRYAACCTGRTGRCTCRT…
ND4_var7	ATYCTAGCRGCAGTAYTRCTYAAGCTTGGRGGATAYGGMATTATTCGRATTACTATRATTCTTACCCCAYTDAYAAAAGAAATAGCRTRYCCSTTTATRATTCTMGCYTTATGRGRRGYYGTRATRACKAGCCTAATYTGYATACGACAAACARACCTTAARTCRMTAATYGCATAYTCRTCYRTWRGCCAYATRGGCCTAGTCATYGCCGCTATYATRATCCAAACACCRT[G/T]AAGCCTRMCAGGRGCTRTTAYYTTAATARTCTCACACGGRCTTATYTCATCARCCCTATTTTGCCTRGCRAACCTAAATTAYGAACGAACRCACAGTCGARCTYTRYTRTTAGTYCGKGGRGCCCAGRSRGTMCTRCCRCTRAYGRYAACCTGRTGRCTCRT…
ND4_var8	ATYCTAGCRGCAGTAYTRCTYAAGCTTGGRGGATAYGGMATTATTCGRATTACTATRATTCTTACCCCAYTDAYAAAAGAAATAGCRTRYCCSTTTATRATTCTMGCYTTATGRGRRGYYGTRATRACKAGCCTAATYTGYATACGACAAACARACCTTAARTCRMTAATYGCATAYTCRTCYRTWRGCCAYATRGGCCTAGTCATYGCCGCTATYATRATCCAAACACCRTKAAGCCTRMCAGG[A/G]GCTRTTAYYTTAATARTCTCACACGGRCTTATYTCATCARCCCTATTTTGCCTRGCRAACCTAAATTAYGAACGAACRCACAGTCGARCTYTRYTRTTAGTYCGKGGRGCCCAGRSRGTMCTRCCRCTRAYGRYAACCTGRTGRCTCRT…
ND4_var9	ATYCTAGCRGCAGTAYTRCTYAAGCTTGGRGGATAYGGMATTATTCGRATTACTATRATTCTTACCCCAYTDAYAAAAGAAATAGCRTRYCCSTTTATRATTCTMGCYTTATGRGRRGYYGTRATRACKAGCCTAATYTGYATACGACAAACARACCTTAARTCRMTAATYGCATAYTCRTCYRTWRGCCAYATRGGCCTAGTCATYGCCGCTATYATRATCCAAACACCRTKAAGCCTRMCAGGRGCTRTTAYYTTAATARTCTCACACGG[A/G]CTTATYTCATCARCCCTATTTTGCCTRGCRAACCTAAATTAYGAACGAACRCACAGTCGARCTYTRYTRTTAGTYCGKGGRGCCCAGRSRGTMCTRCCRCTRAYGRYAACCTGRTGRCTCRT…
ND4_var10	ATYCTAGCRGCAGTAYTRCTYAAGCTTGGRGGATAYGGMATTATTCGRATTACTATRATTCTTACCCCAYTDAYAAAAGAAATAGCRTRYCCSTTTATRATTCTMGCYTTATGRGRRGYYGTRATRACKAGCCTAATYTGYATACGACAAACARACCTTAARTCRMTAATYGCATAYTCRTCYRTWRGCCAYATRGGCCTAGTCATYGCCGCTATYATRATCCAAACACCRTKAAGCCTRMCAGGRGCTRTTAYYTTAATARTCTCACACGGRCTTATYTCATCARCCCTATTTTGCCTRGCRAACCTAAATTAYGAACGAACRCACAGTCGARCTYTRYTRTTAGTYCGKGGRGCCCAGRSRGTMCTRCCRCTRAYGRYAACCTG[G/A]TGRCTCRT…
ND4_var11	ATYCTAGCRGCAGTAYTRCTYAAGCTTGGRGGATAYGGMATTATTCGRATTACTATRATTCTTACCCCAYTDAYAAAAGAAATAGCRTRYCCSTTTATRATTCTMGCYTTATGRGRRGYYGTRATRACKAGCCTAATYTGYATACGACAAACARACCTTAARTCRMTAATYGCATAYTCRTCYRTWRGCCAYATRGGCCTAGTCATYGCCGCTATYATRATCCAAACACCRTKAAGCCTRMCAGGRGCTRTTAYYTTAATARTCTCACACGGRCTTATYTCATCARCCCTATTTTGCCTRGCRAACCTAAATTAYGAACGAACRCACAGTCGARCTYTRYTRTTAGTYCGKGGRGCCCAGRSRGTMCTRCCRCTRAYGRYAACCTGRTG[A/G]CTCRT…
ND4_var12	ATYCTAGCRGCAGTAYTRCTYAAGCTTGGRGGATAYGGMATTATTCGRATTACTATRATTCTTACCCCAYTDAYAAAAGAAATAGCRTRYCCSTTTATRATTCTMGCYTTATGRGRRGYYGTRATRACKAGCCTAATYTGYATACGACAAACARACCTTAARTCRMTAATYGCATAYTCRTCYRTWRGCCAYATRGGCCTAGTCATYGCCGCTATYATRATCCAAACACCRTKAAGCCTRMCAGGRGCTRTTAYYTTAATARTCTCACACGGRCTTATYTCATCARCCCTATTTTGCCTRGCRAACCTAAATTAYGAACGAACRCACAGTCGARCTYTRYTRTTAGTYCGKGGRGCCCAGRSRGTMCTRCCRCTRAYGRYAACCTGRTGRCTCRTYGYA…
ND4_var13	ATYCTAGCRGCAGTAYTRCTYAAGCTTGGRGGATAYGGMATTATTCGRATTACTATRATTCTTACCCCAYTDAYAAAAGAAATAGCRTRYCCSTTTATRATTCTMGCYTTATGRGRRGYYGTRATRACKAGCCTAATYTGYATACGACAAACARACCTTAARTCRMTAATYGCATAYTCRTCYRTWRGCCAYATRGGCCTAGTCATYGCCGCTATYATRATCCAAACACCRTKAAGCCTRMCAGGRGCTRTTAYYTTAATARTCTCACACGGRCTTATYTCATCARCCCTATTTTGCCTRGCRAACCTAAATTAYGAACGAACRCACAGTCGARCTYTRYTRTTAGTYCGKGGRGCCCAGRSRGTMCTRCCRCTRAYGRYAACCTGRTGRCTCRTYGYA…
ND4_var14	ATYCTAGCRGCAGTAYTRCTYAAGCTTGGRGGATAYGGMATTATTCGRATTACTATRATTCTTACCCCAYTDAYAAAAGAAATAGCRTRYCCSTTTATRATTCTMGCYTTATGRGRRGYYGTRATRACKAGCCTAATYTGYATACGACAAACARACCTTAARTCRMTAATYGCATAYTCRTCYRTWRGCCAYATRGGCCTAGTCATYGCCGCTATYATRATCCAAACACCRTKAAGCCTRMCAGGRGCTRTTAYYTTAATARTCTCACACGGRCTTATYTCATCARCCCTATTTTGCCTRGCRAACCTAAATTAYGAACGAACRCACAGTCGARCTYTRYTRTTAGTYCGKGGRGCCCAGRSRGTMCTRCCRCTRAYGRYAACCTGRTGRCTCRTYGYA…
ND4_var15	ATYCTAGCRGCAGTAYTRCTYAAGCTTGGRGGATAYGGMATTATTCGRATTACTATRATTCTTACCCCAYTDAYAAAAGAAATAGCRTRYCCSTTTATRATTCTMGCYTTATGRGRRGYYGTRATRACKAGCCTAATYTGYATACGACAAACARACCTTAARTCRMTAATYGCATAYTCRTCYRTWRGCCAYATRGGCCTAGTCATYGCCGCTATYATRATCCAAACACCRTKAAGCCTRMCAGGRGCTRTTAYYTTAATARTCTCACACGGRCTTATYTCATCARCCCTATTTTGCCTRGCRAACCTAAATTAYGAACGAACRCACAGTCGARCTYTRYTRTTAGTYCGKGGRGCCCAGRSRGTMCTRCCRCTRAYGRYAACCTGRTGRCTCRTYGYA…
ND4_var16	ATYCTAGCRGCAGTAYTRCTYAAGCTTGGRGGATAYGGMATTATTCGRATTACTATRATTCTTACCCCAYTDAYAAAAGAAATAGCRTRYCCSTTTATRATTCTMGCYTTATGRGRRGYYGTRATRACKAGCCTAATYTGYATACGACAAACARACCTTAARTCRMTAATYGCATAYTCRTCYRTWRGCCAYATRGGCCTAGTCATYGCCGCTATYATRATCCAAACACCRTKAAGCCTRMCAGGRGCTRTTAYYTTAATARTCTCACACGGRCTTATYTCATCARCCCTATTTTGCCTRGCRAACCTAAATTAYGAACGAACRCACAGTCGARCTYTRYTRTTAGTYCGKGGRGCCCAGRSRGTMCTRCCRCTRAYGRYAACCTGRTGRCTCRTYGYA…
ND4_var17	ATYCTAGCRGCAGTAYTRCTYAAGCTTGGRGGATAYGGMATTATTCGRATTACTATRATTCTTACCCCAYTDAYAAAAGAAATAGCRTRYCCSTTTATRATTCTMGCYTTATGRGRRGYYGTRATRACKAGCCTAATYTGYATACGACAAACARACCTTAARTCRMTAATYGCATAYTCRTCYRTWRGCCAYATRGGCCTAGTCATYGCCGCTATYATRATCCAAACACCRTKAAGCCTRMCAGGRGCTRTTAYYTTAATARTCTCACACGGRCTTATYTCATCARCCCTATTTTGCCTRGCRAACCTAAATTAYGAACGAACRCACAGTCGARCTYTRYTRTTAGTYCGKGGRGCCCAGRSRGTMCTRCCRCTRAYGRYAACCTGRTGRCTCRTYGYA…
ND4_var18	ATYCTAGCRGCAGTAYTRCTYAAGCTTGGRGGATAYGGMATTATTCGRATTACTATRATTCTTACCCCAYTDAYAAAAGAAATAGCRTRYCCSTTTATRATTCTMGCYTTATGRGRRGYYGTRATRACKAGCCTAATYTGYATACGACAAACARACCTTAARTCRMTAATYGCATAYTCRTCYRTWRGCCAYATRGGCCTAGTCATYGCCGCTATYATRATCCAAACACCRTKAAGCCTRMCAGGRGCTRTTAYYTTAATARTCTCACACGGRCTTATYTCATCARCCCTATTTTGCCTRGCRAACCTAAATTAYGAACGAACRCACAGTCGARCTYTRYTRTTAGTYCGKGGRGCCCAGRSRGTMCTRCCRCTRAYGRYAACCTGRTGRCTCRTYGYA…
ND4_var19	ATYCTAGCRGCAGTAYTRCTYAAGCTTGGRGGATAYGGMATTATTCGRATTACTATRATTCTTACCCCAYTDAYAAAAGAAATAGCRTRYCCSTTTATRATTCTMGCYTTATGRGRRGYYGTRATRACKAGCCTAATYTGYATACGACAAACARACCTTAARTCRMTAATYGCATAYTCRTCYRTWRGCCAYATRGGCCTAGTCATYGCCGCTATYATRATCCAAACACCRTKAAGCCTRMCAGGRGCTRTTAYYTTAATARTCTCACACGGRCTTATYTCATCARCCCTATTTTGCCTRGCRAACCTAAATTAYGAACGAACRCACAGTCGARCTYTRYTRTTAGTYCGKGGRGCCCAGRSRGTMCTRCCRCTRAYGRYAACCTGRTGRCTCRTYGYA…
ND4_var20	ATYCTAGCRGCAGTAYTRCTYAAGCTTGGRGGATAYGGMATTATTCGRATTACTATRATTCTTACCCCAYTDAYAAAAGAAATAGCRTRYCCSTTTATRATTCTMGCYTTATGRGRRGYYGTRATRACKAGCCTAATYTGYATACGACAAACARACCTTAARTCRMTAATYGCATAYTCRTCYRTWRGCCAYATRGGCCTAGTCATYGCCGCTATYATRATCCAAACACCRTKAAGCCTRMCAGGRGCTRTTAYYTTAATARTCTCACACGGRCTTATYTCATCARCCCTATTTTGCCTRGCRAACCTAAATTAYGAACGAACRCACAGTCGARCTYTRYTRTTAGTYCGKGGRGCCCAGRSRGTMCTRCCRCTRAYGRYAACCTGRTGRCTCRTYGYA…
ND4_var21	ATYCTAGCRGCAGTAYTRCTYAAGCTTGGRGGATAYGGMATTATTCGRATTACTATRATTCTTACCCCAYTDAYAAAAGAAATAGCRTRYCCSTTTATRATTCTMGCYTTATGRGRRGYYGTRATRACKAGCCTAATYTGYATACGACAAACARACCTTAARTCRMTAATYGCATAYTCRTCYRTWRGCCAYATRGGCCTAGTCATYGCCGCTATYATRATCCAAACACCRTKAAGCCTRMCAGGRGCTRTTAYYTTAATARTCTCACACGGRCTTATYTCATCARCCCTATTTTGCCTRGCRAACCTAAATTAYGAACGAACRCACAGTCGARCTYTRYTRTTAGTYCGKGGRGCCCAGRSRGTMCTRCCRCTRAYGRYAACCTGRTGRCTCRTYGYA…
ND4_var22	ATYCTAGCRGCAGTAYTRCTYAAGCTTGGRGGATAYGGMATTATTCGRATTACTATRATTCTTACCCCAYTDAYAAAAGAAATAGCRTRYCCSTTTATRATTCTMGCYTTATGRGRRGYYGTRATRACKAGCCTAATYTGYATACGACAAACARACCTTAARTCRMTAATYGCATAYTCRTCYRTWRGCCAYATRGGCCTAGTCATYGCCGCTATYATRATCCAAACACCRTKAAGCCTRMCAGGRGCTRTTAYYTTAATARTCTCACACGGRCTTATYTCATCARCCCTATTTTGCCTRGCRAACCTAAATTAYGAACGAACRCACAGTCGARCTYTRYTRTTAGTYCGKGGRGCCCAGRSRGTMCTRCCRCTRAYGRYAACCTGRTGRCTCRTYGYA…
ND4_var23	ATYCTAGCRGCAGTAYTRCTYAAGCTTGGRGGATAYGGMATTATTCGRATTACTATRATTCTTACCCCAYTDAYAAAAGAAATAGCRTRYCCSTTTATRATTCTMGCYTTATGRGRRGYYGTRATRACKAGCCTAATYTGYATACGACAAACARACCTTAARTCRMTAATYGCATAYTCRTCYRTWRGCCAYATRGGCCTAGTCATYGCCGCTATYATRATCCAAACACCRTKAAGCCTRMCAGGRGCTRTTAYYTTAATARTCTCACACGGRCTTATYTCATCARCCCTATTTTGCCTRGCRAACCTAAATTAYGAACGAACRCACAGTCGARCTYTRYTRTTAGTYCGKGGRGCCCAGRSRGTMCTRCCRCTRAYGRYAACCTGRTGRCTCRTYGYA…
SNPs targeted are between brackets and the first variant, before the /, is diagnostic for Triturus macedonicus, while the second, after the /, is typical for T. ivanbureschi.
Multiple SNPs were identified for some markers and included as different variants and the ones not used (because redundant or not identified as suitable by Kraken) are in italics.
