# Supplementary material for: Absence of heterosis in hybrid crested newts
Source: PeerJ. 2018 Jul 24;6:e5317. doi: 10.7717/peerj.5317 (PMC6063215; doi:10.7717/peerj.5317)
Supplement: Supplemental Information 4 [file peerj-06-5317-s004.xls]

## Sheet: Sheet1
Suppl. Inf. 4
Skeletochronology results along with morphometric data and individual Structure scores
Number	Sex	SVl (mm)	Age (yrs)	Rappprochement (yrs)	Phenotype group	Structure Q-score
6284	Male	63	6	3	3	0.765
6287	Male	65	8	4	4	0.59
6290	Male	73	8	4	1	0.56
6294	Male	71	8	3	3	0.65
6295	Male	64	7	4	3	0.615
6297	Male	56	4	3	5	0.625
6304	Male	75	13	3	3	0.64
6305	Male	61	5	4	3	0.755
6307	Male	60	7	4	4	0.67
6309	Male	59	6	2	3	0.655
6310	Male	57	8	3	2	0.7
6311	Male	71	6	4	3	0.675
6312	Male	56	4	2	4	0.59
6313	Male	64	5	4	4	0.63
6316	Male	60	5	3	4	0.725
6317	Male	77	6	2	3	0.72
6318	Male	58	4	2	5	0.65
6320	Male	61	6	3	3	0.785
6322	Male	69	6	4	3	0.625
6323	Male	69	7	4	2	0.65
6325	Male	62	10	4	3	0.675
6326	Male	66	6	3	4	0.65
6327	Male	61	6	4	2	0.505
6330	Male	57	8	3	4	0.475
6331	Male	58	5	3	5	0.82
6334	Male	59	5	4	4	0.435
6335	Male	65	7	3	3	0.63
6336	Male	68	7	5	3	0.78
6337	Male	58	5	3	3	0.595
6338	Male	65	7	4	5	0.495
6339	Male	54	5	2	3	0.705
6340	Male	62	5	4	3	0.555
6341	Male	67	8	2	3	0.645
6344	Male	57	5	3	3	0.725
6345	Male	69	7	3	4	0.585
6348	Male	52	4	4	4	0.675
6357	Male	64	6	4	3	0.59
6358	Male	69	7	4	3	0.765
6359	Male	67	7	2	4	0.555
6361	Male	71	9	2	1	0.385
6363	Male	57	4	2	4	0.645
6367	Male	63	7	3	3	0.68
6368	Male	63	5	3	4	0.56
6370	Male	57	4	4	4	0.765
6374	Male	71	9	2	5	0.585
6378	Male	65	6	3	3	0.765
6379	Male	69	6	3	3	0.64
6382	Male	64	5	3	3	0.67
6386	Male	72	7	3	1	0.595
6387	Male	67	7	2	3	0.705
6391	Male	58	5	2	3	0.765
6392	Male	62	6	4	5	0.735
6393	Male	69	9	Not observed	3	0.645
6394	Male	64	6	2	5	0.795
6396	Male	60	7	Not observed	4	0.675
6399	Male	55	5	4	3	0.655
6400	Male	73	6	4	3	0.62
6401	Male	64	6	4	3	0.705
6403	Male	56	7	3	3	0.585
6404	Male	74	8	3	1	0.705
6405	Male	81	9	3	3	0.59
6406	Male	66	5	4	4	0.745
6408	Male	65	6	2	3	0.5
6409	Male	68	6	4	2	0.47
6410	Male	52	6	2	3	0.79
6412	Male	71	8	2	3	0.535
6414	Male	76	7	4	3	0.845
6415	Male	63	6	3	5	0.73
6417	Male	70	8	2	4	0.525
6418	Male	56	5	3	3	0.565
6422	Male	62	6	4	3	0.59
6425	Male	64	5	3	1	0.615
6429	Male	57	5	2	3	0.685
6430	Male	57	5	2	3	0.585
6432	Male	61	7	3	3	0.63
6433	Male	72	7	4	1	0.67
6434	Male	63	7	4	5	0.555
6436	Female	68	6	4	3	0.49
6437	Female	72	6	3	3	0.645
6441	Female	78	7	Not observed	3	0.615
6444	Female	87	7	4	2	0.685
6445	Female	57	3	2	3	0.75
6446	Female	68	6	3	3	0.4
6448	Female	70	8	4	4	0.785
6450	Female	64	8	2	4	0.645
6451	Female	64	7	Not observed	4	0.615
6454	Female	68	5	4	2	0.675
6460	Female	68	7	2	4	0.765
6462	Female	76	7	4	4	0.53
6463	Female	67	7	3	2	0.795
6464	Female	73	6	4	3	0.705
6465	Female	73	8	2	4	0.655
6467	Female	63	5	4	3	0.645
6468	Female	64	7	4	5	0.7
6470	Female	66	5	3	3	0.56
6471	Female	65	5	2	3	0.68
6474	Female	65	4	4	3	0.82
6475	Female	64	4	2	4	0.615
6477	Female	64	6	3	3	0.645
6479	Female	77	8	2	4	0.645
6483	Female	71	6	4	4	0.645
6484	Female	69	6	4	3	0.565
6485	Female	67	6	3	3	0.705
6487	Female	67	7	2	1	0.765
6489	Female	65	7	4	3	0.615
6491	Female	81	11	Not observed	1	0.665
6492	Female	76	11	4	2	0.765
6494	Female	64	6	4	3	0.645
6497	Female	57	5	3	2	0.595
6502	Female	77	8	2	2	0.565
6503	Female	82	8	Not observed	5	0.76
6504	Female	68	8	3	2	0.765
6509	Female	67	6	Not observed	5	0.505
6510	Female	72	7	3	3	0.645
6511	Female	72	6	4	1	0.555
6513	Female	66	5	2	3	0.5
6514	Female	75	5	4	4	0.585
6515	Female	57	4	4	3	0.585
6517	Female	64	6	Not observed	4	0.795
6520	Female	75	7	3	1	0.59
6521	Female	74	7	4	5	0.535
6523	Female	58	3	3	2	0.68
6524	Female	59	3	3	3	0.615
6525	Female	70	7	2	5	0.565
6526	Female	66	6	Not observed	5	0.675
6527	Female	70	8	Not observed	3	0.65
6529	Female	67	6	4	3	0.565
6536	Female	59	5	2	1	0.525
6538	Female	70	5	4	2	0.525
6542	Female	58	5	3	4	0.645
6543	Female	68	7	Not observed	1	0.675
6544	Female	54	4	3	5	0.735
6547	Female	66	6	3	3	0.555
6548	Female	66	6	2	4	0.585
6550	Female	65	5	4	2	0.595
6551	Female	68	5	2	3	0.675
6552	Female	67	6	5	5	0.645
6554	Female	78	11	3	2	0.65
6555	Female	70	7	2	3	0.735
6558	Female	64	6	3	4	0.735
6559	Female	64	7	2	3	0.73
6561	Female	66	8	2	3	0.675
6562	Female	79	7	4	2	0.7
6564	Female	61	6	2	3	0.46
6565	Female	55	5	Not observed	5	0.475
6568	Female	64	6	4	2	0.59
6574	Female	67	5	4	3	0.67
6575	Female	72	5	2	4	0.585
6577	Female	68	7	3	3	0.56
6581	Female	66	6	3	4	0.59
6583	Female	76	9	3	4	0.57
6585	Female	53	4	3	3	0.445
6587	Female	74	9	4	4	0.7
6590	Female	76	7	2	3	0.415
6591	Female	64	5	2	5	0.75
6594	Female	71	8	Not observed	1	0.615
6595	Female	78	9	3	4	0.67
6597	Female	74	6	2	3	0.585
6601	Female	74	8	2	4	0.62
6602	Female	71	7	2	5	0.7
6605	Female	67	6	2	3	0.72
6611	Female	70	6	4	4	0.495
6613	Juvenile	37	3	Not applicable
6614	Juvenile	40	3	Not applicable
6615	Juvenile	38	2	Not applicable
6616	Juvenile	35	2	Not applicable
6617	Juvenile	45	4	Not applicable
6618	Juvenile	46	3	Not applicable
6619	Juvenile	48	3	Not applicable
6620	Juvenile	48	3	Not applicable
