# Supplementary material for: Absence of heterosis in hybrid crested newts
Source: PeerJ. 2018 Jul 24;6:e5317. doi: 10.7717/peerj.5317 (PMC6063215; doi:10.7717/peerj.5317)
Supplement: Supplemental Information 5 — Parameter values and 95% confidence intervals (CI) in the Von Bertalanffy growth curves for Triturus populations in the west and southeast of the genus’ range. Triturus cristatus and T. marmoratus are hybridizing in a wide area of range overlap. The focal Vlasi population is of mixed T. macedonicus–T. ivanbureschi ancestry. [file peerj-06-5317-s005.xlsx]

## Sheet: VonB data
Supplementary Information 5
Parameter values and 95% confidence intervals (CI) in the Von Bertalanffy growth curves for Triturus populations in the west and southeast of the genus' range. Triturus cristatus and T. marmoratus are hybridizing in a wide area of range overlap. The focal Vlasi population is of mixed T. macedonicus - T. ivanbureschi ancestry.
				Males				Females
				SVl_inf	k	t0		SVl_inf	k	t0
Western Europe *
	Triturus cristatus (48 males and 39 females)
		Median		66.14	1			71.52	1.23
		CI lower bound		63.07	0.63			68.95	0.71
		CI upper bound		69.22	1.38			74.1	1.75
	Triturus marmoratus (32 males and 37 females)
		Median		64.6	0.63			No model fit
		CI lower bound		61.84	0.36
		CI upper bound		67.35	0.91
	F1 interspecies hybrids (24 males and 33 females)
		Median		69.52	0.46			78.49	0.34
		CI lower bound		65.83	0.23			70.99	0.18
		CI upper bound		73.21	0.7			86	0.5
Southeastern Europe
	Vlasi (85 males and 93 females)
		Median		72.9988	0.35821	0.236743		78.7194	0.338079	0.120006
		CI lower bound		68.9886	0.226958	-0.942639		74.328	0.214144	-1.01228
		CI upper bound		80.3289	0.504961	0.930813		86.9451	0.467888	0.797024
	Triturus macedonicus #
		Ceklin, Lokanj and Rid (51 males and 50 females)
		Median		79.5596	0.254404	-2.34197		81.3585	0.34888	-0.222221
		CI lower bound		74.2524	0.0439346	-18.4558		76.1098	0.0589421	-14.5449
		CI upper bound		109.651	0.961224	2.62546		108.773	1.06271	2.78491
	Triturus ivanbureschi
		Keşan (42 males and 34 females) $
		Median		74.229	0.419598	0.450323		74.4611	0.401125	0.337104
		CI lower bound		70.9191	0.0709168	-10.5037		70.7556	0.0741788	-10.5086
		CI upper bound		96.1488	1.1243	3.19043		95.1782	1.16872	3.25388
		Klaros (45 males and 39 females) &
		Median		73.8842	0.448013	-1.32029		85.1659	0.23246	-2.58285
		CI lower bound		70.6374	0.221789	-3.99164		78.1079	0.0867741	-7.03424
		CI upper bound		80.1643	0.931056	0.0159908		108.989	0.402187	-1.01334
* Data from Francillon-Vieillot et al. (1990). The t0-parameter is set to 30 mm, reflecting approximate SVl at metamorphosis.
# Data from Cvetković et al. (1996) and A. Ivanović (unpublished).
$ Data from Üzüm (2006).
& Data from Üzüm and Olgun (2009).
