# Supplementary material for: Absence of heterosis in hybrid crested newts
Source: PeerJ. 2018 Jul 24;6:e5317. doi: 10.7717/peerj.5317 (PMC6063215; doi:10.7717/peerj.5317)
Supplement: Supplemental Information 6 — Skeletochronology results for Triturus macedonicus from three populations in Montenegro, located away from areas in interspecific hybridization. The material is from the batrachalogical collection of the Institute of Biological Research “Siniša Stanković” and was collected in 1993–1996 (Džukić et al., 2015). Afterwards the material was cleared and stained for other studies (Ivanović et al., 2008, Tomašević Tomašević-Kolarov, Ivanović & Kalezić, 2011, Ivanović & Arntzen, 2014). [file peerj-06-5317-s006.xlsx]

## Sheet: age
Suppl. Inf. 6
Skeletochronology results for Triturus macedonicus from three populations in Montenegro, located away from areas in interspecific hybridization. The material is from the batrachological collection of the Institute of Biological Research "Siniša Stanković" (Džukić et al., 2015), with skelettochronological studies in 1993-1996. Afterwards the material was cleared and stained for yet other studies (…
Locality	Number	Collecting date	Sex	SVl (mm)	Age (yrs)	Rappprochement (yrs)
Ceklin
	1	10.04.1992	Female	81.5	8	3
	2	10.04.1992	Female	74	10	5
	3	10.04.1992	Female	71	6
	4	10.04.1992	Female	79.5	6
	5	11.05.1992	Female	69.6	11	4
	6	11.05.1992	Female	83.4	10	3
	7	29.04.1992	Female	86.4	9	3
	8	29.04.1992	Female	73.6	6	4
	9	29.04.1992	Female	88.9	9	5
	10	29.04.1992	Female	84.7	10	3
	11	29.04.1992	Female	83.7	8	3
	12	29.04.1992	Female	83.5	8
	13	29.04.1992	Female	77.8	6	4
	14	5.11.1992	Female	64.5	7
	15	5.11.1992	Female	85.2	10	3
	16	5.11.1992	Female	78.6	12	3
	17	5.11.1992	Female	88.9	7	4
	18	5.11.1992	Female	79.1	7	2
	19	5.11.1992	Female	86.3	11
	20	5.11.1992	Female	77.9	8	4
	21	5.11.1992	Female	63.1	6	3
	22	5.11.1992	Female	80.4	9	4
	23	5.11.1992	Female	76	11	4
	24	11.02.1994	Male	77.79	11	4
	25	11.02.1994	Male	66.98	10
	26	11.02.1994	Male	74	10	2
	27	11.05.1992	Male	80.4	9	4
	28	11.05.1992	Male	87.5	13	4
	29	11.05.1992	Male	82.1	11	3
	30	11.05.1992	Male	76.6	8	4
	31	11.05.1992	Male	80.7	11	5
	32	11.05.1992	Male	77.9	8
	33	11.05.1992	Male	75	6	3
	34	11.05.1992	Male	79.5	7	3
	35	11.05.1992	Male	73	7	3
	36	25.02.1992	Male	63.83	6
	37	25.02.1992	Male	68.3	7
	38	25.02.1992	Male	73.8	7
	39	30.10.1992	Male	77.4	10	4
	40	30.10.1992	Male	75.6	9	4
	41	30.10.1992	Male	83	8	5
	42	30.10.1992	Male	79.4	6
	43	30.10.1992	Male	78.4	9	4
	44	30.10.1992	Male	80.6	14	3
	45	30.10.1992	Male	75.3	8
	46	30.10.1992	Male	75.6	11	3
Lokanj
	47	16.09.1991	Female	72.97	6	2
	48	16.09.1991	Female	65.88	4	2
	49	16.09.1991	Female	75.45	6	3
	50	16.09.1991	Female	70.22	7	3
	51	16.09.1991	Female	64.42	5
	52	16.09.1991	Female	72.53	12	3
	53	16.09.1991	Female	73.01	7	3
	54	16.09.1991	Female	74.88	7	4
	55	16.09.1991	Female	75.58	8	2
	56	16.09.1991	Female	69.52	7	2
	57	16.09.1991	Female	53.38	5	3
	58	16.09.1991	Female	62.79	7	2
	59	25.02.1992	Female	75.58	8	3
	60	25.02.1992	Female	69.17	6	4
	61	8.06.1990	Female	74.83	6	3
	62	8.06.1990	Female	75.83	5	2
	63	8.06.1990	Female	78.17	6	3
	64	8.06.1990	Female	65.82	6	3
	65	11.02.1992	Male	62.18	5	2
	66	11.02.1992	Male	73.08	9	3
	67	11.02.1992	Male	70.81	6	2
	68	11.02.1992	Male	65.46	12	2
	69	11.02.1992	Male	64.78	8	2
	70	19.09.1991	Male	61.04	8	2
	71	19.09.1991	Male	68.01	6	3
	72	19.09.1991	Male	66.89	6	3
	73	19.09.1991	Male	62.37	8	2
	74	19.09.1991	Male	73.87	5	3
	75	5.11.1992	Male	69.4	11	4
	76	5.11.1992	Male	76.7	9	3
	77	8.06.1992	Male	66.07	5	3
	78	8.06.1992	Male	70.2	5	3
	79	8.06.1992	Male	67.68	5	3
	80	8.06.1992	Male	58.41	10	3
	81	8.06.1992	Male	68.22	5	2
	82	8.06.1992	Male	58.74	4
Rid, Jankovića krš
	83	28.07.1992	Female	64.1	7
	84	28.07.1992	Female	82.8	5	4
	85	28.07.1992	Female	71.4	9	3
	86	28.07.1992	Female	69.9	9	4
	87	28.07.1992	Female	72.5	6
	88	28.07.1992	Female	79.1	13	4
	89	28.07.1992	Female	80.8	10	3
	90	28.07.1992	Female	74.4	7	3
	91	28.07.1992	Female	62.4	6	4
	92	23.07.1992	Male	76.9	8
	93	23.07.1992	Male	72.1	7	4
	94	23.07.1992	Male	69.4	5	3
	95	23.07.1992	Male	70.7	6
	96	23.07.1992	Male	76.8	8	3
	97	23.07.1992	Male	77.8	10	4
	98	23.07.1992	Male	65.8	6	4
	99	23.07.1992	Male	74.4	6	4
	100	23.07.1992	Male	78	9	5
	101	23.07.1992	Male	86.8	12	4
References
Džukić G, Cvijanović M, Urošević A, Vukov T, Tomašević Kolarov N, Slijepčević M, Ivanović A, Kalezić ML. 2015. The Batrachological collections of the Institute for Biological Research "Siniša Stanković", University of Belgrade. Bulletin of the Natural History Museum 8:118-167.
Ivanović A, Arntzen JW. 2014 Evolution of skull and body shape in Triturus newts reconstructed from three-dimensional morphometric data and phylogeny. Biological Journal of the Linnean Society 113:243-255.
Ivanović A, Sotiropoulos K, Vukov TD, Eleftherakos K, Džukić G, Polymeni RM, Kalezić ML. 2008. Cranial shape variation and molecular phylogenetic structure of crested newts (Triturus cristatus superspecies: Caudata, Salamandridae) in the Balkans. Biological Journal of the Linnean Society 95:348-360.
Tomašević-Kolarov N, Ivanović A, Kalezić ML. 2011. Morphological integration and ontogenetic niche shift: a study of crested newt limbs. Journal of Experimental Zoology Part B: Molecular and Developmental Evolution 316:296-305.
